# Supplementary material for: Optical properties of amorphous carbon determined by reflection electron energy loss spectroscopy spectra
Source: Royal Society of Chemistry journal article supplement (doi:10.1039/d1cp02447g), 2021-01-01
Supplement: d1cp02447g1.pdf [file d1cp02447g1.pdf]

## Electronic Supplementary Information

### Optical properties of amorphous carbon measured with reflection electron energy loss spectroscopy spectra

L.H. Yang<sup>1,2</sup>, A. Sulyok<sup>3</sup>, M. Menyhárd<sup>3,#</sup>, G. Sáfrán<sup>3</sup>, K. Tókési<sup>4,\$</sup>, B. Da<sup>2,5</sup> and Z.J. Ding<sup>1,\*</sup>

<sup>1</sup>Hefei National Laboratory for Physical Sciences at Microscale and Department of Physics, University of Science and Technology of China, Hefei, Anhui 230026, P.R. China

<sup>2</sup>Research and Services Division of Materials Data and Integrated System, National Institute for Materials Science, 1-1 Namiki, Tsukuba, Ibaraki 305-0044, Japan

<sup>3</sup>Institute for Technical Physics and Materials Science, Centre for Energy Research, Budapest, Hungary

<sup>4</sup>Institute for Nuclear Research (ATOMKI), Debrecen, Hungary

<sup>5</sup>Research Center for Advanced Measurement and Characterization, National Institute for Materials Science, 1-2-1 Sengen, Tsukuba, Ibaraki 305-0047, Japan

Corresponding author:

<sup>#</sup>e-mail: [menyhard.miklos@energia.mta.hu](mailto:menyhard.miklos@energia.mta.hu)

<sup>\$</sup>e-mail: [tokesi@atomki.mta.hu](mailto:tokesi@atomki.mta.hu)

<sup>\*</sup>e-mail: [zjding@ustc.edu.cn](mailto:zjding@ustc.edu.cn)

The x-ray atomic scattering factor,  $f = f_1 + if_2$ , is the resonant scattering amplitude of x-rays by charge (primarily electron) density, and it can be used to determine the optical constants of materials at a wavelength of  $\lambda$  by applying the following two equations [1]:

$$1 - n = \frac{r_0 \lambda^2 N_A \rho}{2\pi A} f_1; \quad (\text{S1})$$

$$k = \frac{r_0 \lambda^2 N_A \rho}{2\pi A} f_2, \quad (\text{S2})$$

where  $r_0$  is the classical electron radius ( $e^2/mc^2$ ),  $N_A$  is the Avogadro's constant,  $A$  is the atomic mass, and  $\rho$  is the mass density. Eqs. (S1)-(S2) are usually valid for the inner-shell excitation in the high energy range, and may not be satisfied for the

valence electron excitation. In order to introduce the atomic scattering factor for the determination of optical constants in the low energy range, one can use the following equations [2,3]:

$$1 - \varepsilon_1 = \frac{r_0 \lambda^2 N_A \rho}{\pi A} f_1; \quad (\text{S3})$$

$$\varepsilon_2 = \frac{r_0 \lambda^2 N_A \rho}{\pi A} f_2. \quad (\text{S4})$$

We note that in the high energy range, Eqs. (S1)-(S2) are basically equivalent to Eqs. (S3)-(S4). Drude model and Lorentzian model are widely used for the expression of dielectric function. The Drude dielectric function and Lorentz dielectric function are expressed as:

$$\varepsilon_D = \varepsilon_{D,1} + i\varepsilon_{D,2} = 1 - \frac{\omega_p^2}{\omega(\omega + i\omega\gamma)}, \quad (\text{S5})$$

$$\varepsilon_L = \varepsilon_{L,1} + i\varepsilon_{L,2} = 1 + \frac{\omega_p^2}{\omega_0^2 - \omega^2 + i\omega\gamma}, \quad (\text{S6})$$

where  $\omega_p \propto \sqrt{n}$  is the plasmon frequency. The same conditions are satisfied for Eqs. (S3)-(S4), Drude model, and Lorentzian model, i.e. both  $1 - \varepsilon_1$  and  $\varepsilon_2$  are proportional to the density. Based on Eqs. (S3)-(S4), one can easily determine the atomic scattering factor from the dielectric function. Table S1 shows the atomic scattering factors of amorphous carbon up to 200 eV.

Based on the atomic scattering factors, one can obtain the metal-treated dielectric function. The relationships on  $\text{Im}[-1/\varepsilon(q=0, \omega)]$  and  $\text{Re}[-1/\varepsilon(q=0, \omega)]$  between metal and semiconductor are,

$$\text{Im} \left[ \frac{-1}{\varepsilon(q=0, \omega)} \right]_{\text{semiconductor}} = \text{Im} \left[ \frac{-1}{\varepsilon(q=0, \omega)} \right]_{\text{metal}}; \quad (\text{S7})$$

$$\text{Re} \left[ \frac{-1}{\varepsilon(q=0, \omega)} \right]_{\text{semiconductor}} = \frac{-1}{n^2(q=0, \omega=0)} + \text{Re} \left[ \frac{-1}{\varepsilon(q=0, \omega)} \right]_{\text{metal}}. \quad (\text{S8})$$

Then the semiconductor-treated dielectric function and optical constants can be determined.

### References

- [1] B.L. Henke, E.M. Gullikson, and J.C. Davis, X-ray interactions: photoabsorption, scattering, transmission, and reflection at  $E= 50\text{-}30,000$  eV,  $Z= 1\text{-}92$ , At. Data Nucl. Data Tables 54, 181-342 (1993).
- [2] S. Logothetidis, Optical and electronic properties of amorphous carbon materials, Diamond Relat. Mater. 12, 141-150 (2003).
- [3] B.L. Henke, P. Lee, T.J. Tanaka, R.L. Shimabukuro, and B.K. Fujikawa, Low-energy X-ray interaction coefficients: Photoabsorption, scattering, and reflection:  $E= 100\text{-}2000$  eV  $Z= 1\text{-}94$ , At. Data Nucl. Data Tables 27, 1-144 (1982).

**Table S1.** List of the atomic scattering factors of amorphous carbon for ELFs.

| $E$ (eV) | $f_1(0)$ | $f_2(0)$ | $E$ (eV) | $f_1(0)$ | $f_2(0)$ | $E$ (eV) | $f_1(0)$ | $f_2(0)$ |
|----------|----------|----------|----------|----------|----------|----------|----------|----------|
| 0.5      | 0.004312 | 0.079004 | 20.5     | 2.817146 | 3.014360 | 40.5     | 4.063171 | 1.794128 |
| 1.0      | 0.015507 | 0.153129 | 21.0     | 2.887936 | 2.938680 | 41.0     | 4.077130 | 1.767994 |
| 1.5      | 0.030017 | 0.219247 | 21.5     | 2.941840 | 2.868011 | 41.5     | 4.090034 | 1.742109 |
| 2.0      | 0.042342 | 0.276666 | 22.0     | 2.983397 | 2.807329 | 42.0     | 4.101694 | 1.716355 |
| 2.5      | 0.048666 | 0.328221 | 22.5     | 3.020944 | 2.760812 | 42.5     | 4.112250 | 1.691081 |
| 3.0      | 0.047140 | 0.378197 | 23.0     | 3.060671 | 2.721877 | 43.0     | 4.121569 | 1.666148 |
| 3.5      | 0.040903 | 0.428913 | 23.5     | 3.103507 | 2.685866 | 43.5     | 4.129789 | 1.641910 |
| 4.0      | 0.028795 | 0.477933 | 24.0     | 3.146159 | 2.649139 | 44.0     | 4.136771 | 1.618285 |
| 4.5      | 0.007144 | 0.528216 | 24.5     | 3.186690 | 2.612857 | 44.5     | 4.142745 | 1.595767 |
| 5.0      | -0.02278 | 0.583751 | 25.0     | 3.224348 | 2.577490 | 45.0     | 4.147820 | 1.574304 |
| 5.5      | -0.06063 | 0.644078 | 25.5     | 3.260028 | 2.544784 | 45.5     | 4.152572 | 1.554185 |
| 6.0      | -0.11118 | 0.713474 | 26.0     | 3.294507 | 2.513826 | 46.0     | 4.157101 | 1.534927 |
| 6.5      | -0.16983 | 0.802889 | 26.5     | 3.328657 | 2.484675 | 46.5     | 4.161691 | 1.516440 |
| 7.0      | -0.22483 | 0.910884 | 27.0     | 3.362001 | 2.455920 | 47.0     | 4.166013 | 1.498322 |
| 7.5      | -0.27768 | 1.030325 | 27.5     | 3.394368 | 2.428012 | 47.5     | 4.170115 | 1.480690 |
| 8.0      | -0.33363 | 1.167689 | 28.0     | 3.425214 | 2.400579 | 48.0     | 4.173685 | 1.463422 |
| 8.5      | -0.38419 | 1.333562 | 28.5     | 3.454831 | 2.374592 | 48.5     | 4.176843 | 1.446805 |
| 9.0      | -0.41372 | 1.526479 | 29.0     | 3.483251 | 2.349703 | 49.0     | 4.179440 | 1.430784 |
| 9.5      | -0.41418 | 1.735269 | 29.5     | 3.511148 | 2.326608 | 49.5     | 4.181725 | 1.415661 |
| 10.0     | -0.38634 | 1.951552 | 30.0     | 3.538638 | 2.304676 | 50.0     | 4.183670 | 1.401318 |
| 10.5     | -0.32993 | 2.172521 | 30.5     | 3.566426 | 2.284252 | 51.0     | 4.187533 | 1.375331 |
| 11.0     | -0.24101 | 2.392947 | 31.0     | 3.594480 | 2.264546 | 52.0     | 4.192083 | 1.352268 |
| 11.5     | -0.11883 | 2.602997 | 31.5     | 3.623375 | 2.245646 | 53.0     | 4.197769 | 1.331171 |
| 12.0     | 0.031466 | 2.793622 | 32.0     | 3.652888 | 2.226734 | 54.0     | 4.204453 | 1.311298 |
| 12.5     | 0.201825 | 2.960271 | 32.5     | 3.683384 | 2.207714 | 55.0     | 4.211871 | 1.292279 |
| 13.0     | 0.384942 | 3.102671 | 33.0     | 3.714431 | 2.187809 | 56.0     | 4.219863 | 1.273952 |
| 13.5     | 0.575988 | 3.222800 | 33.5     | 3.746070 | 2.166843 | 57.0     | 4.228410 | 1.256162 |
| 14.0     | 0.772777 | 3.322961 | 34.0     | 3.777612 | 2.144231 | 58.0     | 4.237467 | 1.238698 |
| 14.5     | 0.975275 | 3.404202 | 34.5     | 3.808726 | 2.120000 | 59.0     | 4.246977 | 1.221285 |
| 15.0     | 1.184095 | 3.464681 | 35.0     | 3.838640 | 2.094004 | 60.0     | 4.256662 | 1.203662 |
| 15.5     | 1.397090 | 3.499517 | 35.5     | 3.866970 | 2.066747 | 61.0     | 4.266149 | 1.185758 |
| 16.0     | 1.606478 | 3.504871 | 36.0     | 3.893276 | 2.038461 | 62.0     | 4.275143 | 1.167769 |
| 16.5     | 1.801972 | 3.483554 | 36.5     | 3.917543 | 2.009950 | 63.0     | 4.283577 | 1.149975 |
| 17.0     | 1.977807 | 3.444280 | 37.0     | 3.939811 | 1.981389 | 64.0     | 4.291600 | 1.132537 |
| 17.5     | 2.134687 | 3.395449 | 37.5     | 3.960468 | 1.953430 | 65.0     | 4.299359 | 1.115447 |
| 18.0     | 2.276188 | 3.341607 | 38.0     | 3.979720 | 1.925892 | 66.0     | 4.306943 | 1.098588 |
| 18.5     | 2.405496 | 3.284146 | 38.5     | 3.998039 | 1.899078 | 67.0     | 4.314312 | 1.081812 |
| 19.0     | 2.524395 | 3.222996 | 39.0     | 4.015449 | 1.872538 | 68.0     | 4.321349 | 1.064993 |
| 19.5     | 2.633355 | 3.157680 | 39.5     | 4.032214 | 1.846379 | 69.0     | 4.327834 | 1.048108 |
| 20.0     | 2.731659 | 3.087869 | 40.0     | 4.048102 | 1.820183 | 70.0     | 4.333489 | 1.031312 |

**Table S1.** (continue)

| $E$ (eV) | $f_1(0)$ | $f_2(0)$ | $E$ (eV) | $f_1(0)$ | $f_2(0)$ | $E$ (eV) | $f_1(0)$ | $f_2(0)$ |
|----------|----------|----------|----------|----------|----------|----------|----------|----------|
| 71.0     | 4.338162 | 1.014980 | 98.0     | 4.415767 | 0.703563 | 150      | 4.43781  | 0.434214 |
| 72.0     | 4.342036 | 0.999569 | 99.0     | 4.416211 | 0.695060 | 152      | 4.437039 | 0.427151 |
| 73.0     | 4.345656 | 0.985285 | 100      | 4.416536 | 0.686899 | 154      | 4.436220 | 0.420240 |
| 74.0     | 4.349476 | 0.971918 | 102      | 4.417083 | 0.671588 | 156      | 4.435323 | 0.413423 |
| 75.0     | 4.353701 | 0.959047 | 104      | 4.417652 | 0.657478 | 158      | 4.434161 | 0.406656 |
| 76.0     | 4.358190 | 0.946340 | 106      | 4.418464 | 0.644299 | 160      | 4.432961 | 0.399928 |
| 77.0     | 4.362774 | 0.933646 | 108      | 4.419492 | 0.631814 | 162      | 4.431351 | 0.393265 |
| 78.0     | 4.367257 | 0.920954 | 110      | 4.420703 | 0.619895 | 164      | 4.429345 | 0.386725 |
| 79.0     | 4.371553 | 0.908319 | 112      | 4.422076 | 0.608496 | 166      | 4.426985 | 0.380388 |
| 80.0     | 4.375615 | 0.895806 | 114      | 4.423579 | 0.597562 | 168      | 4.424467 | 0.374327 |
| 81.0     | 4.379429 | 0.883468 | 116      | 4.425257 | 0.586983 | 170      | 4.421425 | 0.368592 |
| 82.0     | 4.383027 | 0.871332 | 118      | 4.427129 | 0.576622 | 172      | 4.418428 | 0.363199 |
| 83.0     | 4.386409 | 0.859410 | 120      | 4.429032 | 0.566386 | 174      | 4.415256 | 0.358129 |
| 84.0     | 4.389674 | 0.847693 | 122      | 4.430942 | 0.556230 | 176      | 4.412031 | 0.353318 |
| 85.0     | 4.392747 | 0.836172 | 124      | 4.432693 | 0.546159 | 178      | 4.408942 | 0.348626 |
| 86.0     | 4.395646 | 0.824836 | 126      | 4.434368 | 0.536195 | 180      | 4.405889 | 0.343860 |
| 87.0     | 4.398376 | 0.813676 | 128      | 4.435682 | 0.526372 | 182      | 4.402919 | 0.338865 |
| 88.0     | 4.400949 | 0.802688 | 130      | 4.436825 | 0.516729 | 184      | 4.399592 | 0.333580 |
| 89.0     | 4.403311 | 0.791875 | 132      | 4.437574 | 0.507322 | 186      | 4.395937 | 0.328010 |
| 90.0     | 4.405483 | 0.781237 | 134      | 4.438147 | 0.498214 | 188      | 4.391678 | 0.322226 |
| 91.0     | 4.407489 | 0.770781 | 136      | 4.438523 | 0.489450 | 190      | 4.386738 | 0.316378 |
| 92.0     | 4.409324 | 0.760511 | 138      | 4.438791 | 0.481007 | 192      | 4.381108 | 0.310627 |
| 93.0     | 4.410887 | 0.750436 | 140      | 4.439077 | 0.472797 | 194      | 4.374852 | 0.305062 |
| 94.0     | 4.412283 | 0.740567 | 142      | 4.439187 | 0.464729 | 196      | 4.368226 | 0.299680 |
| 95.0     | 4.413447 | 0.730920 | 144      | 4.439201 | 0.456783 | 198      | 4.361143 | 0.294422 |
| 96.0     | 4.414432 | 0.721519 | 146      | 4.438948 | 0.449018 | 200      | 4.353503 | 0.289205 |
| 97.0     | 4.415197 | 0.712390 | 148      | 4.438435 | 0.441491 |          |          |          |
